# Supplementary material for: SImplification of Medications Prescribed to Long-tErm care Residents (SIMPLER): study protocol for a cluster randomised controlled trial
Source: Springer Nature journal article supplement (doi:10.1186/s13063-017-2417-2), 2018-01-12
Supplement: MOESM3 [file 15362000]

## CONSENT FOR RESEARCH PARTICIPANTS

### Simplification of Medications Prescribed to Long term care Residents (SIMPLER)

I have been invited to participate in this research project.

| <b>I understand that:</b>                                                                                                                                                                                                                 | Yes                      | No                       |
|-------------------------------------------------------------------------------------------------------------------------------------------------------------------------------------------------------------------------------------------|--------------------------|--------------------------|
| 1. I may not directly benefit from taking part in the research project.                                                                                                                                                                   | <input type="checkbox"/> | <input type="checkbox"/> |
| 2. While information gained during the research project may be published, I will not be identified and my personal results will remain confidential.                                                                                      | <input type="checkbox"/> | <input type="checkbox"/> |
| 3. I can withdraw from the research project at any stage and this will not affect my medical care, now or in the future. I understand that any information provided prior to my withdrawal will continue to be used in the data analysis. | <input type="checkbox"/> | <input type="checkbox"/> |
| 4. I have had the opportunity to discuss taking part in this research project with a family member or friend.                                                                                                                             | <input type="checkbox"/> | <input type="checkbox"/> |

| <b>I consent to the following:</b>                                                                                                                                                                                                                                  | Yes                      | No                       |
|---------------------------------------------------------------------------------------------------------------------------------------------------------------------------------------------------------------------------------------------------------------------|--------------------------|--------------------------|
| 5. I have read and understood the Information Sheet provided to me, and I hereby consent to take part in this research project.                                                                                                                                     | <input type="checkbox"/> | <input type="checkbox"/> |
| 6. I give permission for the research team to contact my general practitioner, community pharmacy or the pharmacist providing residential medication management reviews (RMMRs) at the facility if further information is required for the purpose of this study.   | <input type="checkbox"/> | <input type="checkbox"/> |
| 7. I give permission for the research team to access data about my medications, RMMRs, medical conditions, clinical assessments, falls and other incidents, and any periods I am admitted to hospital, over the previous twelve months and during the study period. | <input type="checkbox"/> | <input type="checkbox"/> |

| I consent to the following:                                                                                                                                                       | Yes                      | No                       |
|-----------------------------------------------------------------------------------------------------------------------------------------------------------------------------------|--------------------------|--------------------------|
| 8. I give permission for the research team to access data about me from the South Australian Ambulance Service                                                                    | <input type="checkbox"/> | <input type="checkbox"/> |
| 9. I give permission for the research team to access data about me from the South Australian Consumer and Business Service: Births, Deaths and Marriages during the study period. | <input type="checkbox"/> | <input type="checkbox"/> |
| 10. I consent to be invited to provide feedback on the impact of this research project.                                                                                           | <input type="checkbox"/> | <input type="checkbox"/> |

Participant name : \_\_\_\_\_

Participant signature : \_\_\_\_\_

Dated : \_\_\_\_\_

I certify that I have explained the research project to the participant and consider that he/she understands what is involved.

Research Nurse : \_\_\_\_\_  
signature

Dated : \_\_\_\_\_

Witness signature : \_\_\_\_\_

Dated : \_\_\_\_\_
